# Supplementary material for: The Effects of Nano-Curcumin Supplementation on Risk Factors for Cardiovascular Disease: A GRADE-Assessed Systematic Review and Meta-Analysis of Clinical Trials
Source: MDPI journal article supplement (doi:10.3390/antiox10071015), 2021-06-24
Supplement: s1 [file s1]

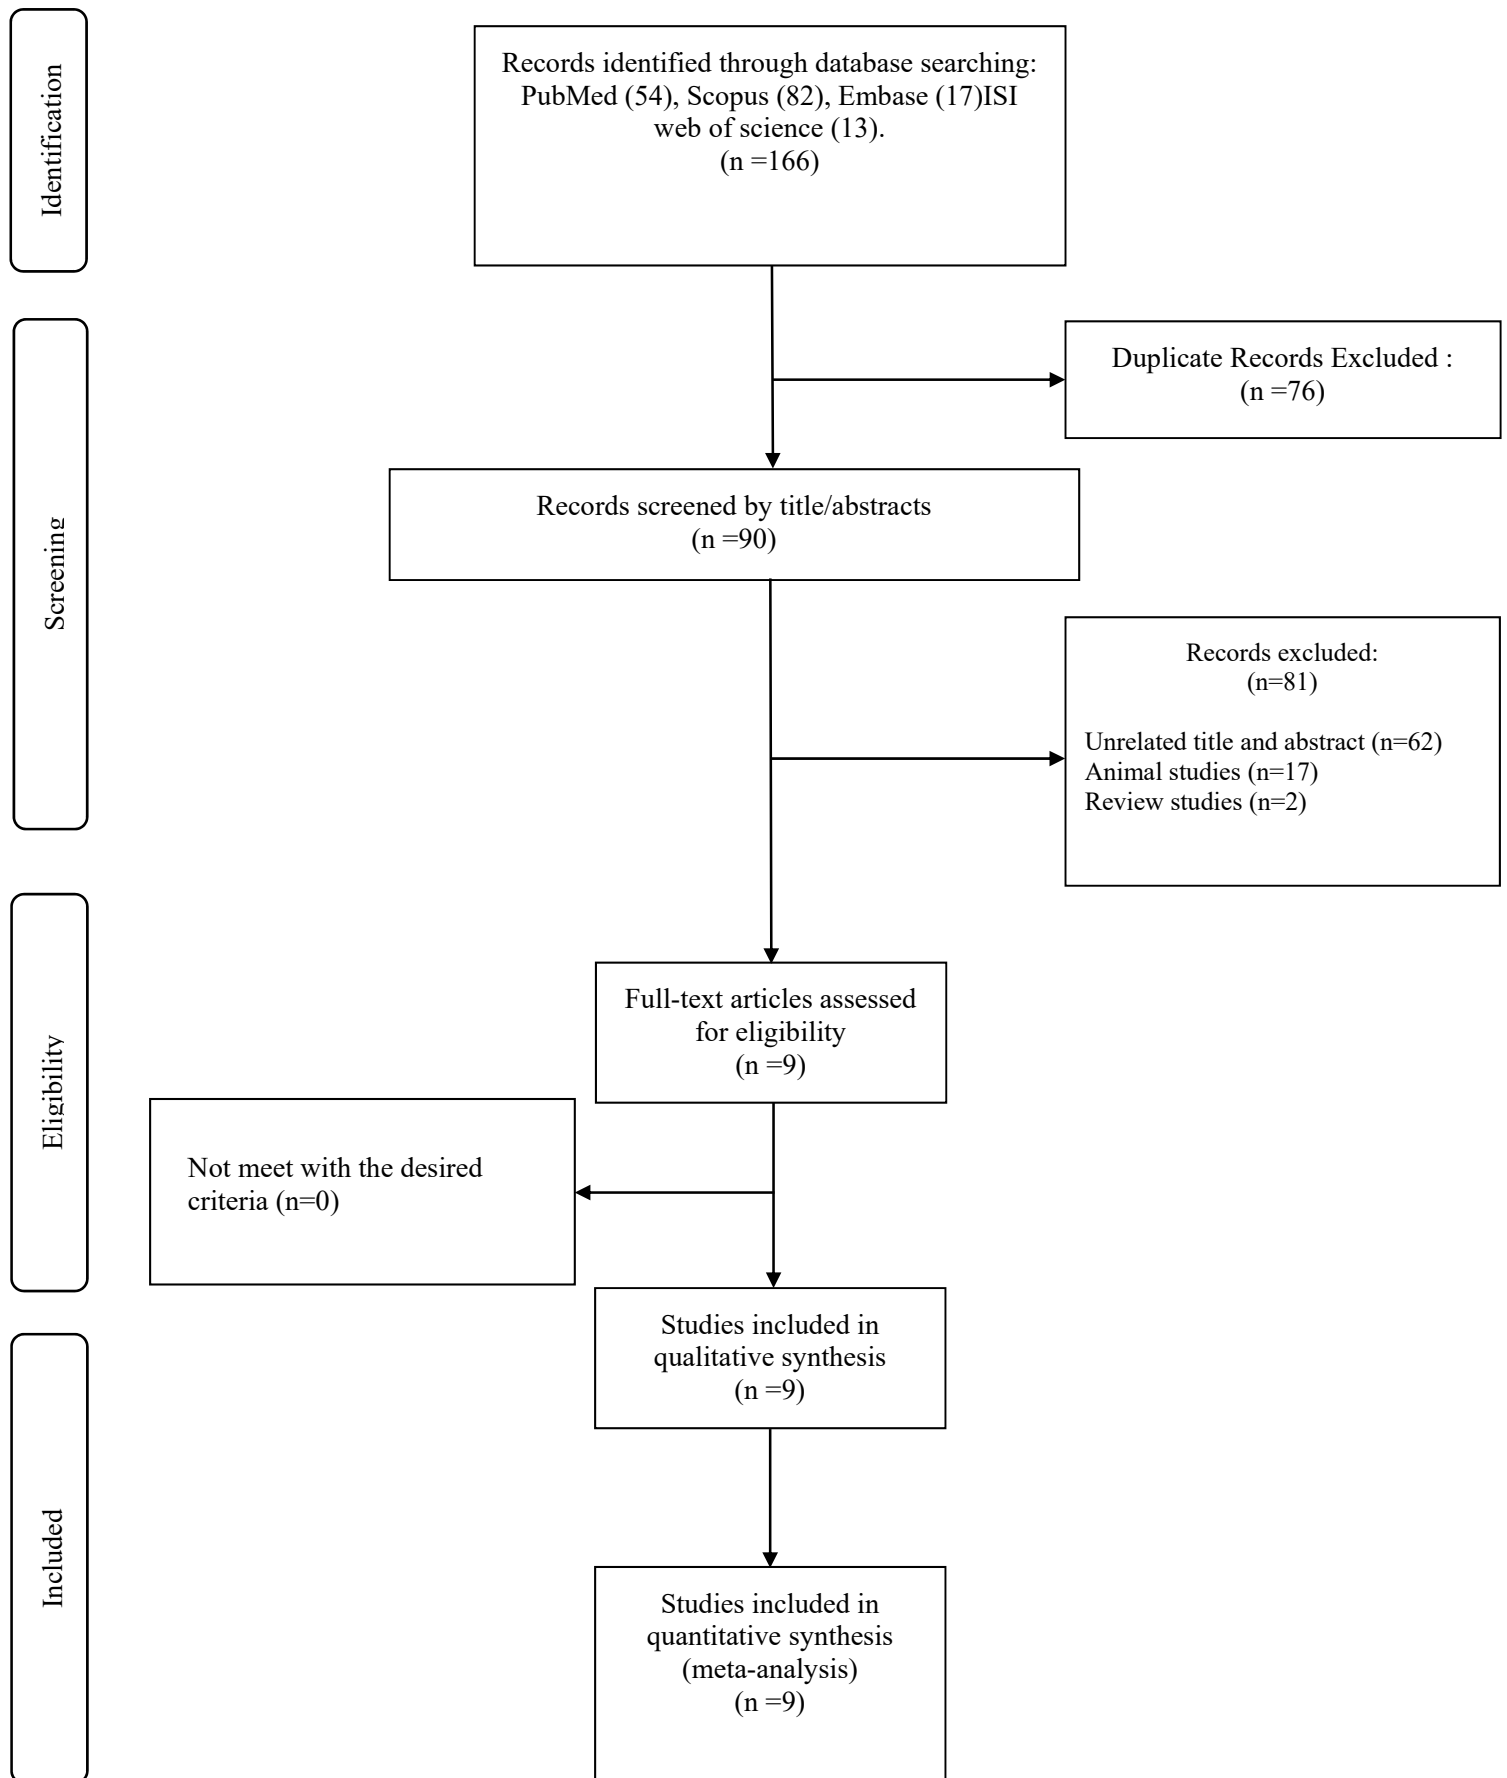

**Supplementary Figure S1.** Flowchart of study selection for inclusion trials in the systematic review.

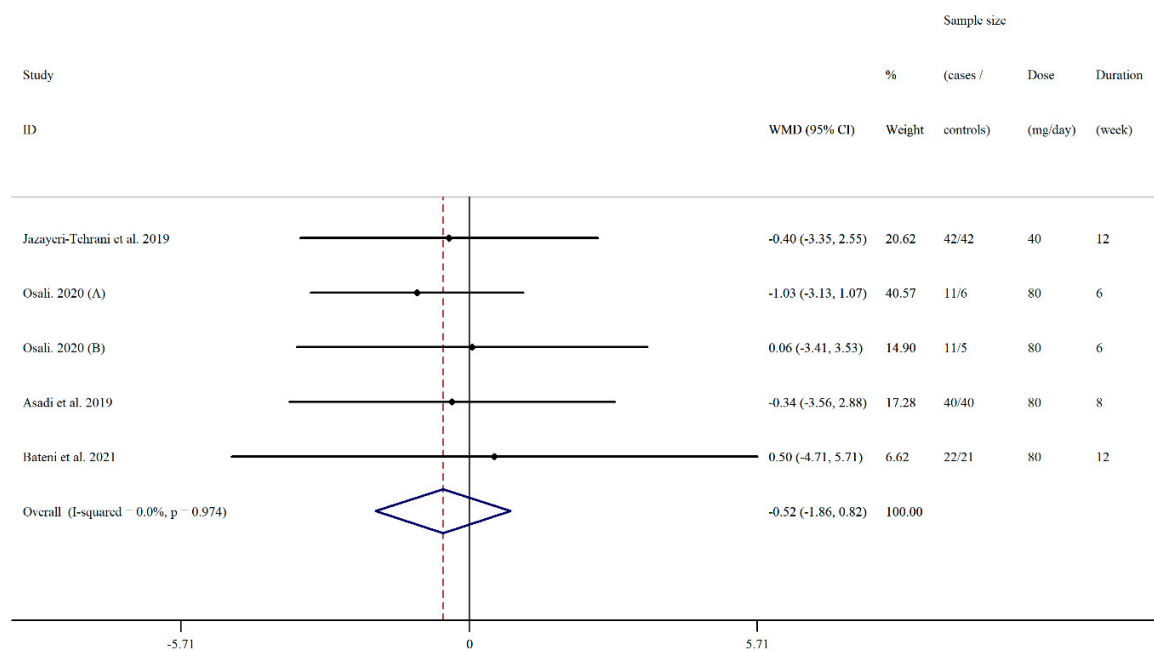

**Supplementary Figure S2.** Forest plot of the random-effects meta-analysis of the effect of nano-curcumin on body weight.

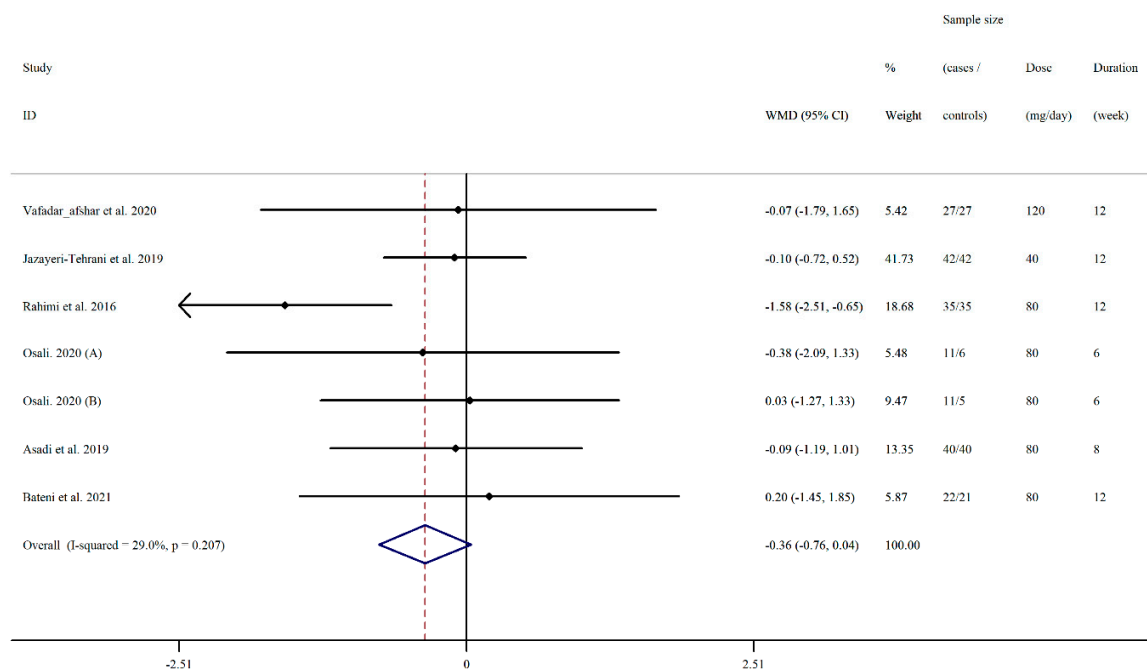

**Supplementary Figure S3.** Forest plot of the random-effects meta-analysis of the effect of nano-curcumin on BMI.

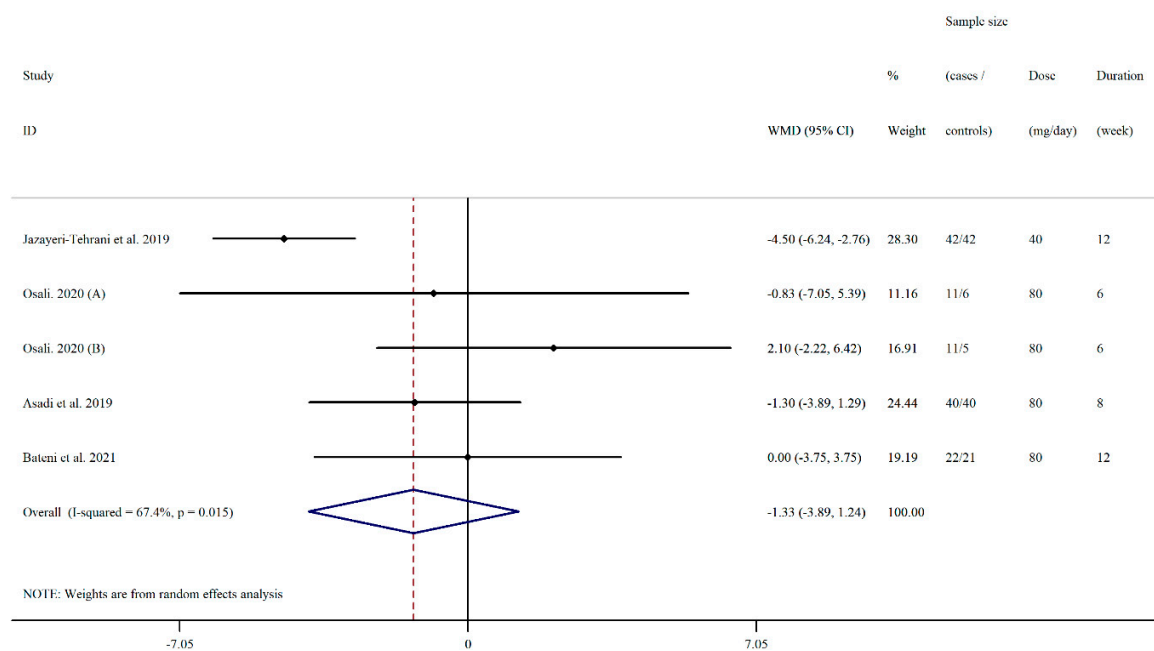

**Supplementary Figure S4.** Forest plot of the random-effects meta-analysis of the effect of nano-curcumin on WC.

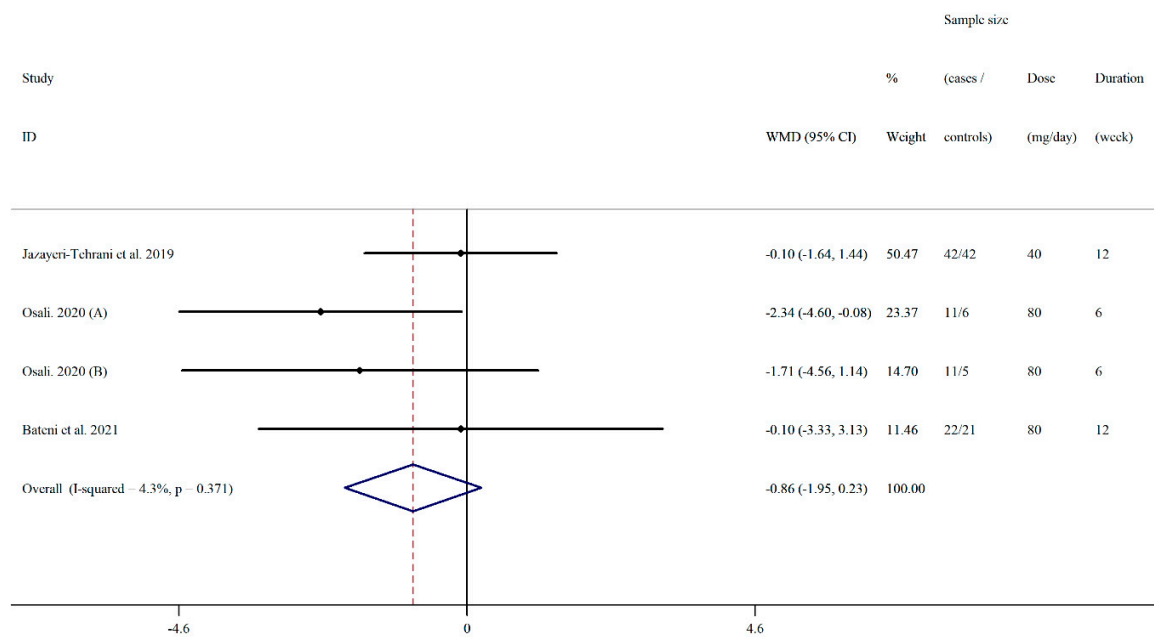

**Supplementary Figure S5.** Forest plot of the random-effects meta-analysis of the effect of nano-curcumin on FM.

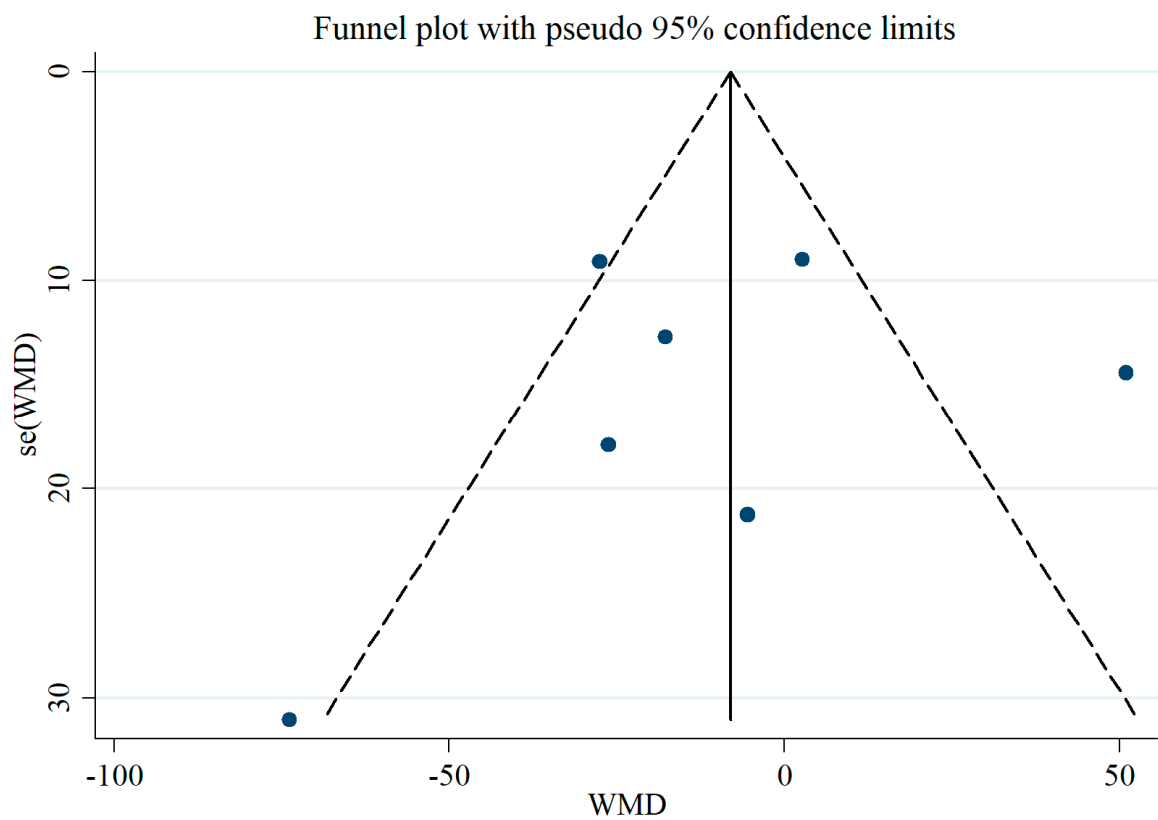

**Supplementary Figure S6.** Funnel plot representing publication bias in the studies reporting the effect of nano-curcumin on TG.

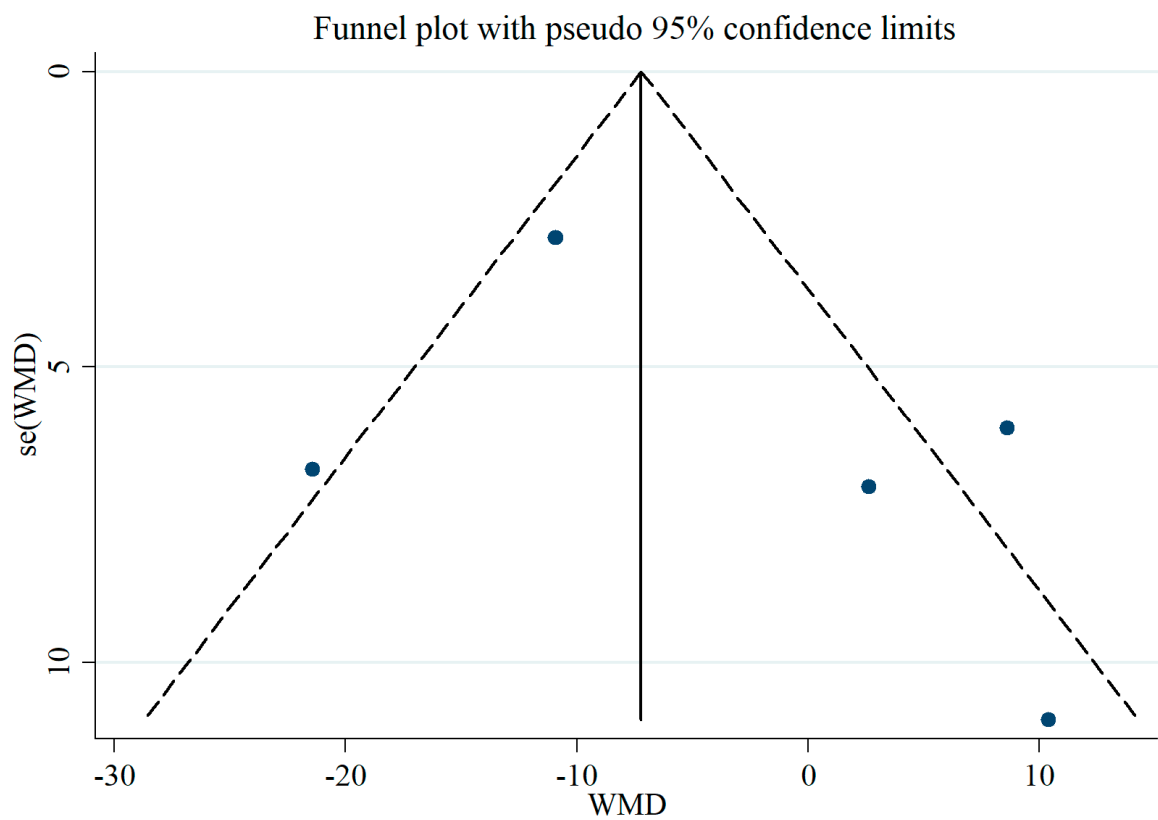

**Supplementary Figure S7.** Funnel plot representing publication bias in the studies reporting the effect of nano-curcumin on TC.

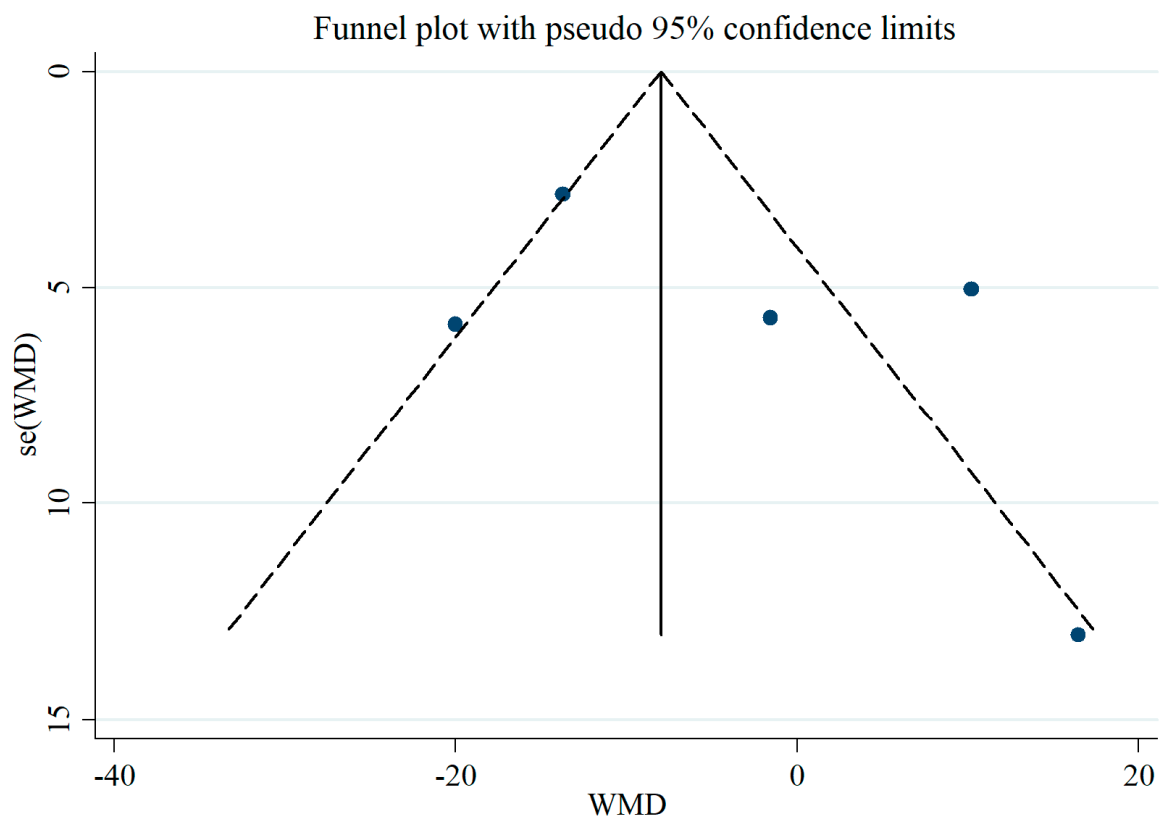

**Supplementary Figure S8.** Funnel plot representing publication bias in the studies reporting the effect of nano-curcumin on LDL.



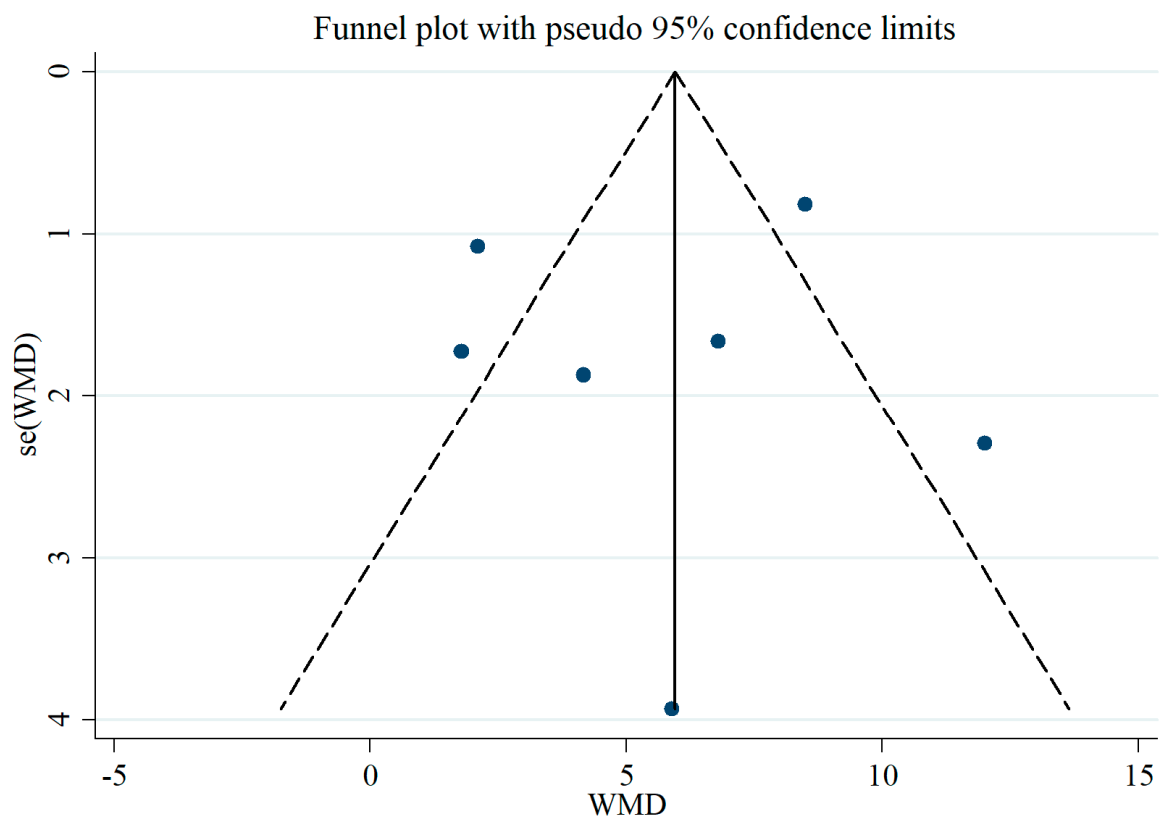

**Supplementary Figure S9.** Funnel plot representing publication bias in the studies reporting the effect of nano-curcumin on HDL.

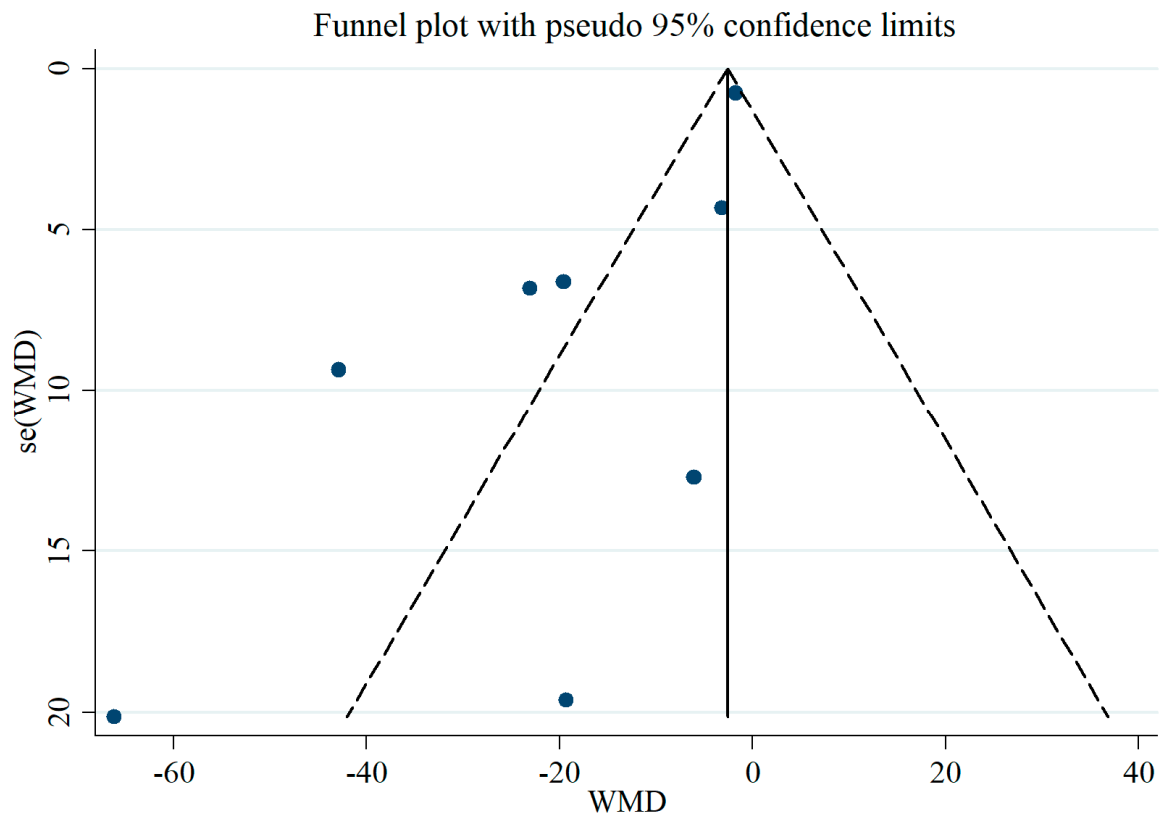

**Supplementary Figure S10.** Funnel plot representing publication bias in the studies reporting the effect of nano-curcumin on FBS.

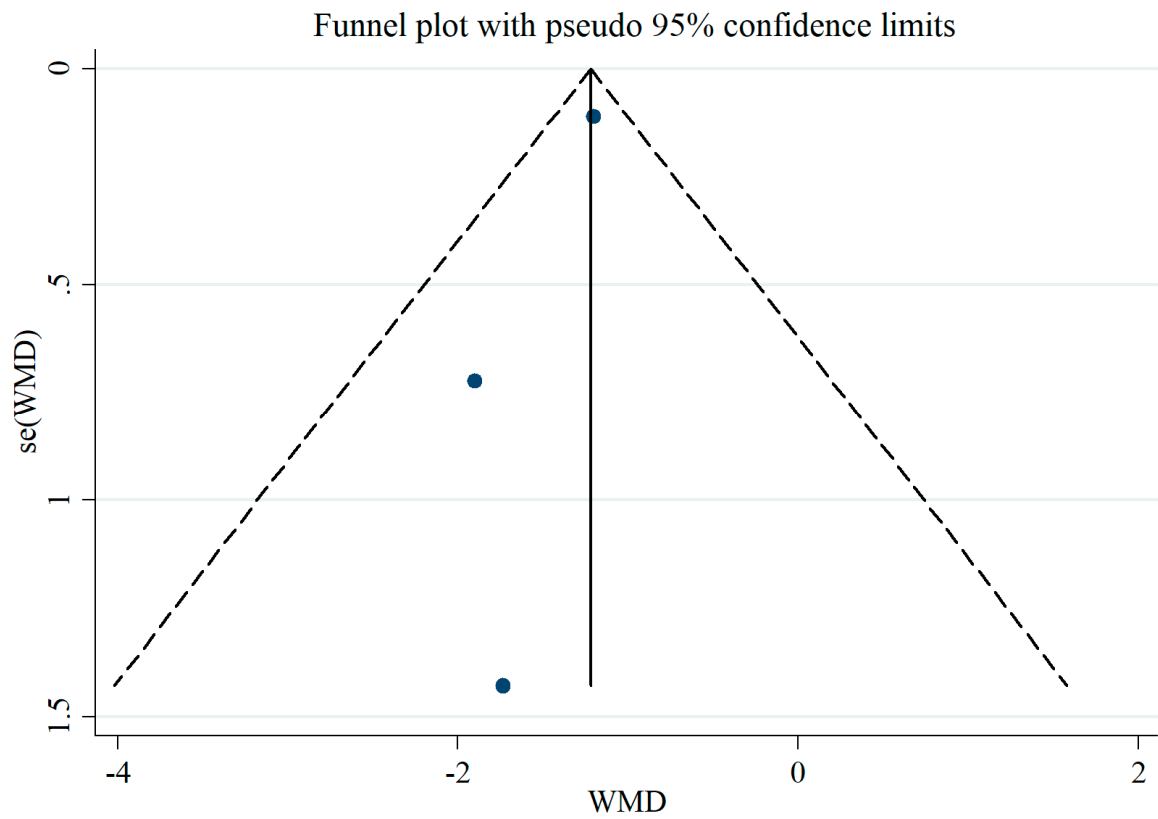

**Supplementary Figure S11.** Funnel plot representing publication bias in the studies reporting the effect of nano-curcumin on fasting insulin.

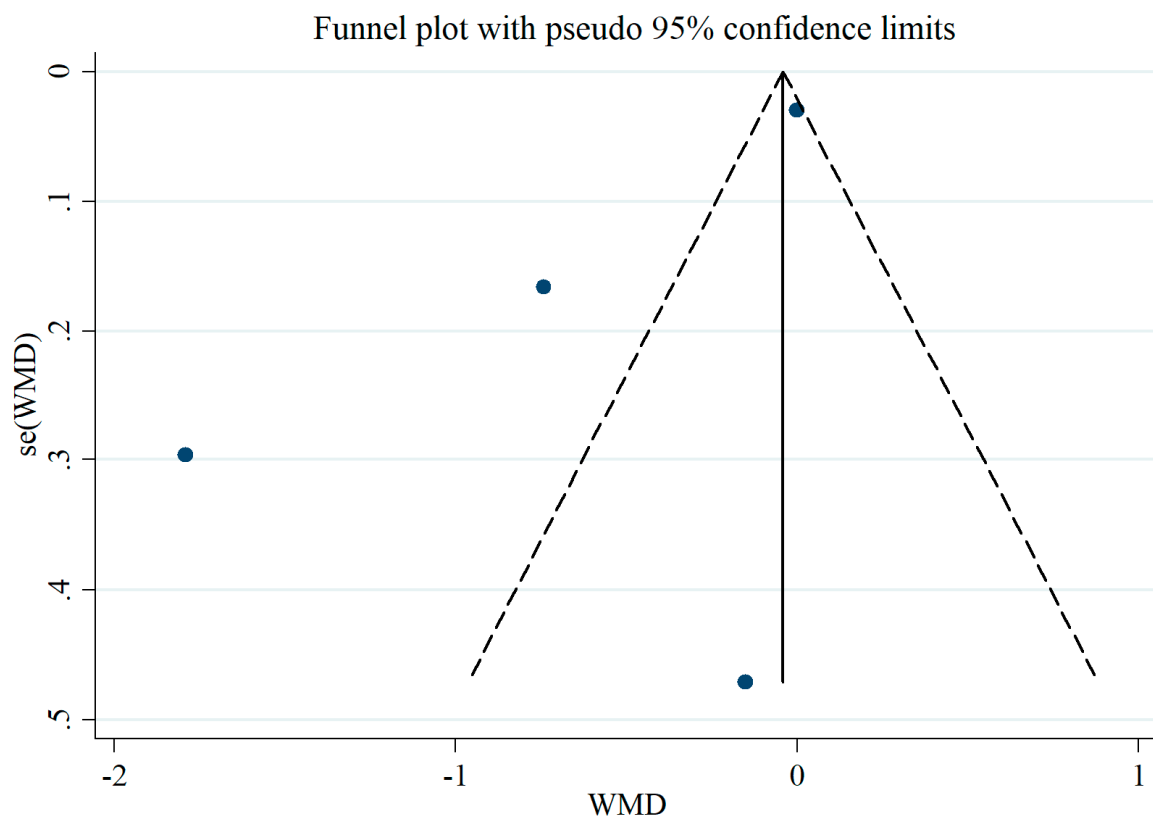

**Supplementary Figure S12.** Funnel plot representing publication bias in the studies reporting the effect of nano-curcumin on HbA1c.

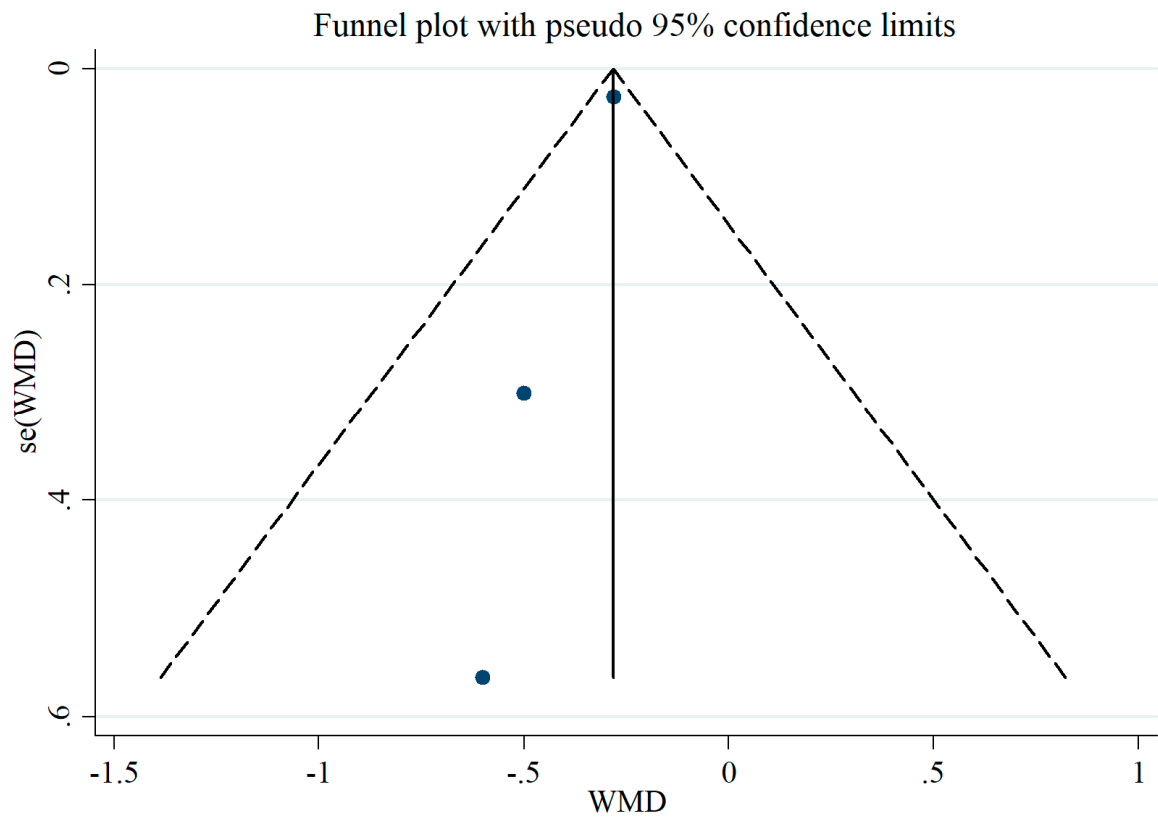

**Supplementary Figure S13.** Funnel plot representing publication bias in the studies reporting the effect of nano-curcumin on HOMA-IR.

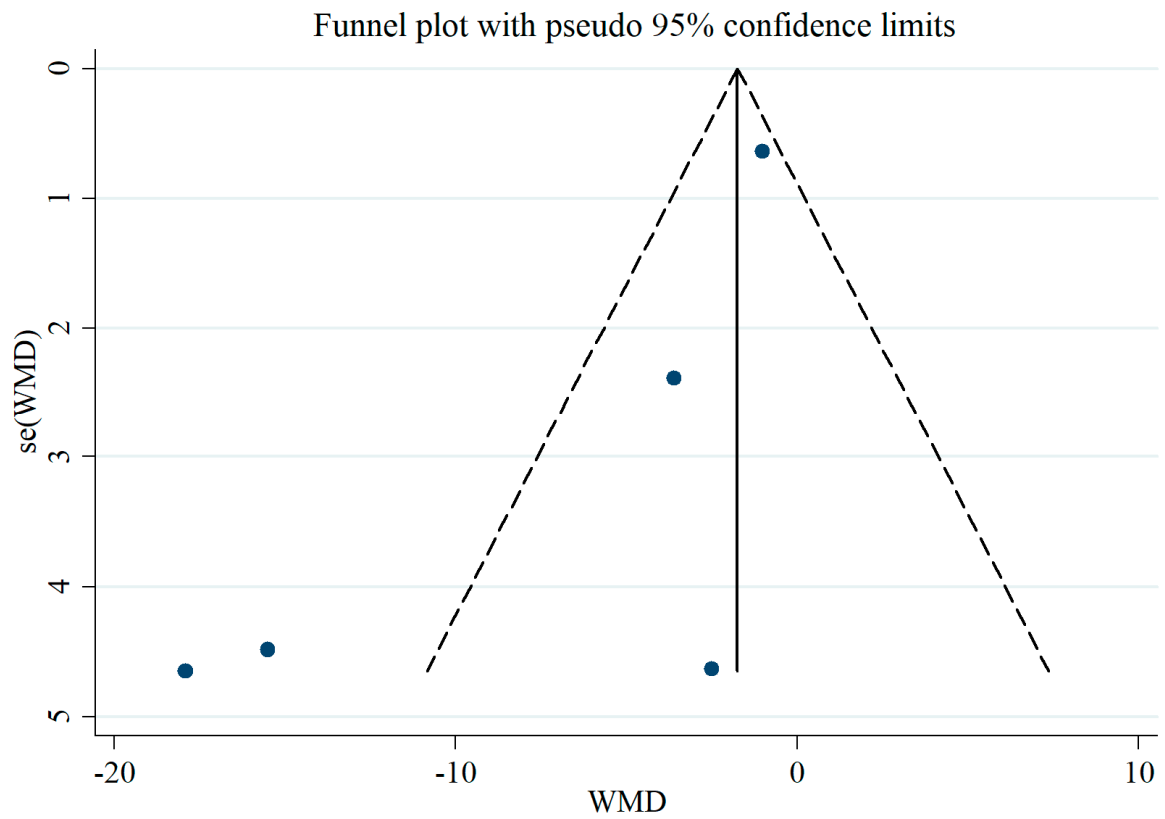

**Supplementary Figure S14.** Funnel plot representing publication bias in the studies reporting the effect of nano-curcumin on SBP.

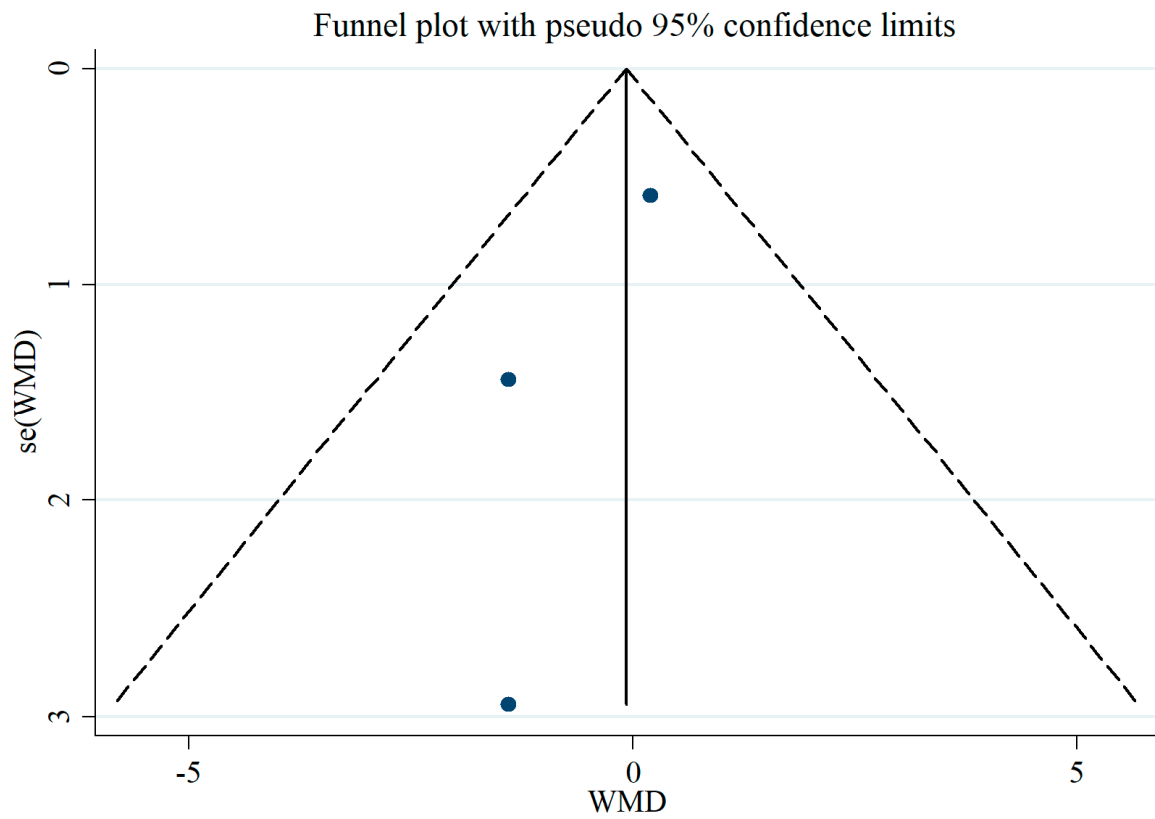

**Supplementary Figure S15.** Funnel plot representing publication bias in the studies reporting the effect of nano-curcumin on DBP.

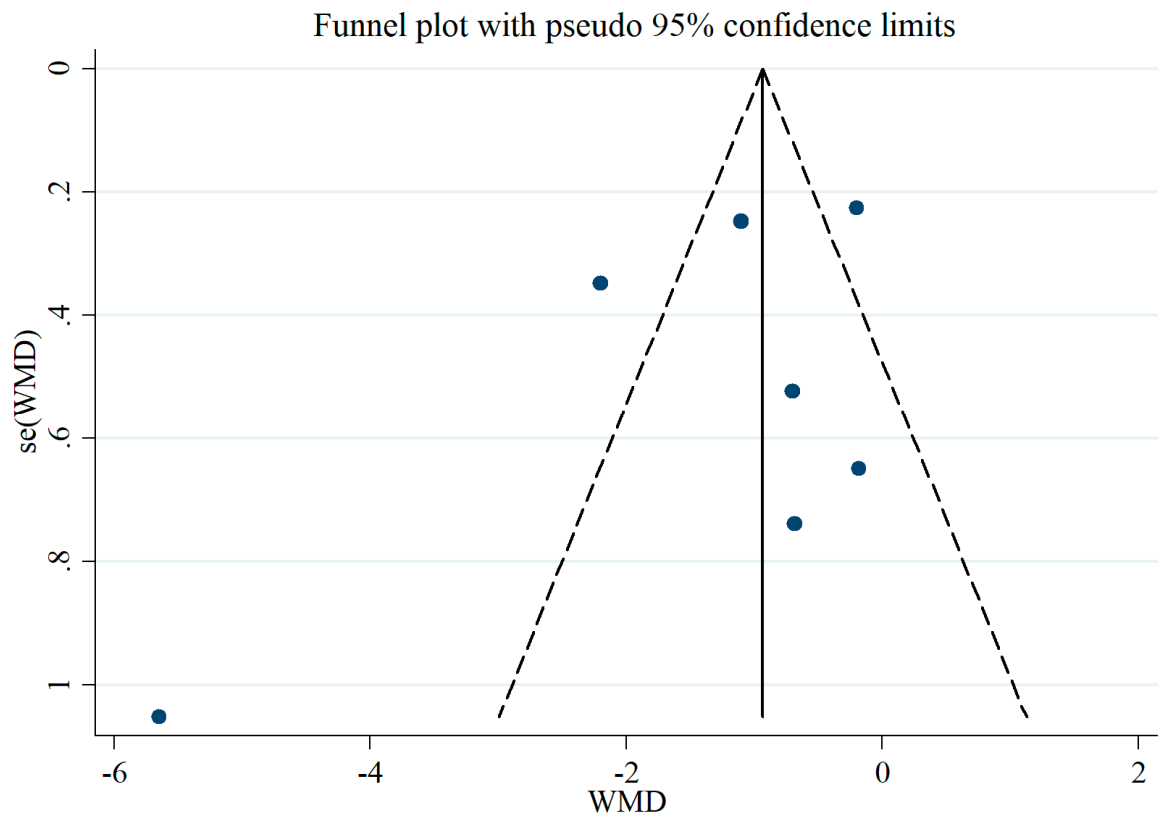

**Supplementary Figure S16.** Funnel plot representing publication bias in the studies reporting the effect of nano-curcumin on CRP.



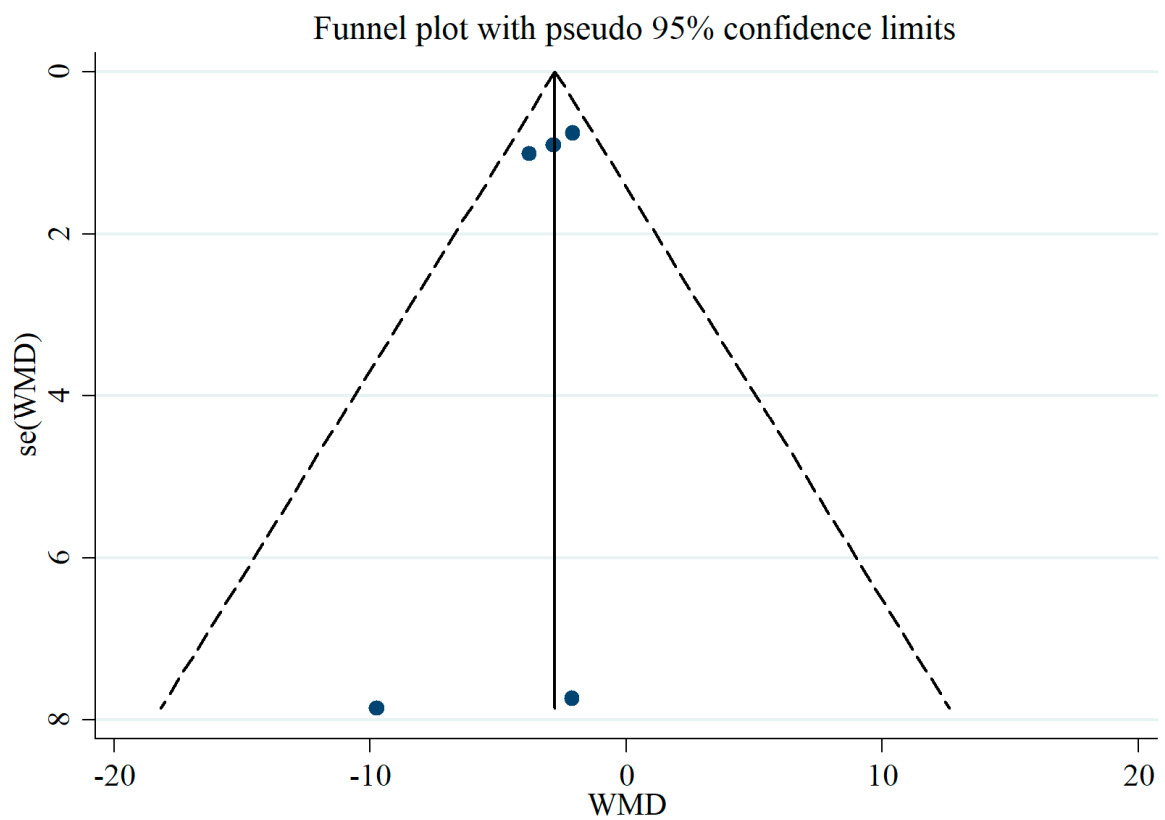

**Supplementary Figure S17.** Funnel plot representing publication bias in the studies reporting the effect of nano-curcumin on IL-6.

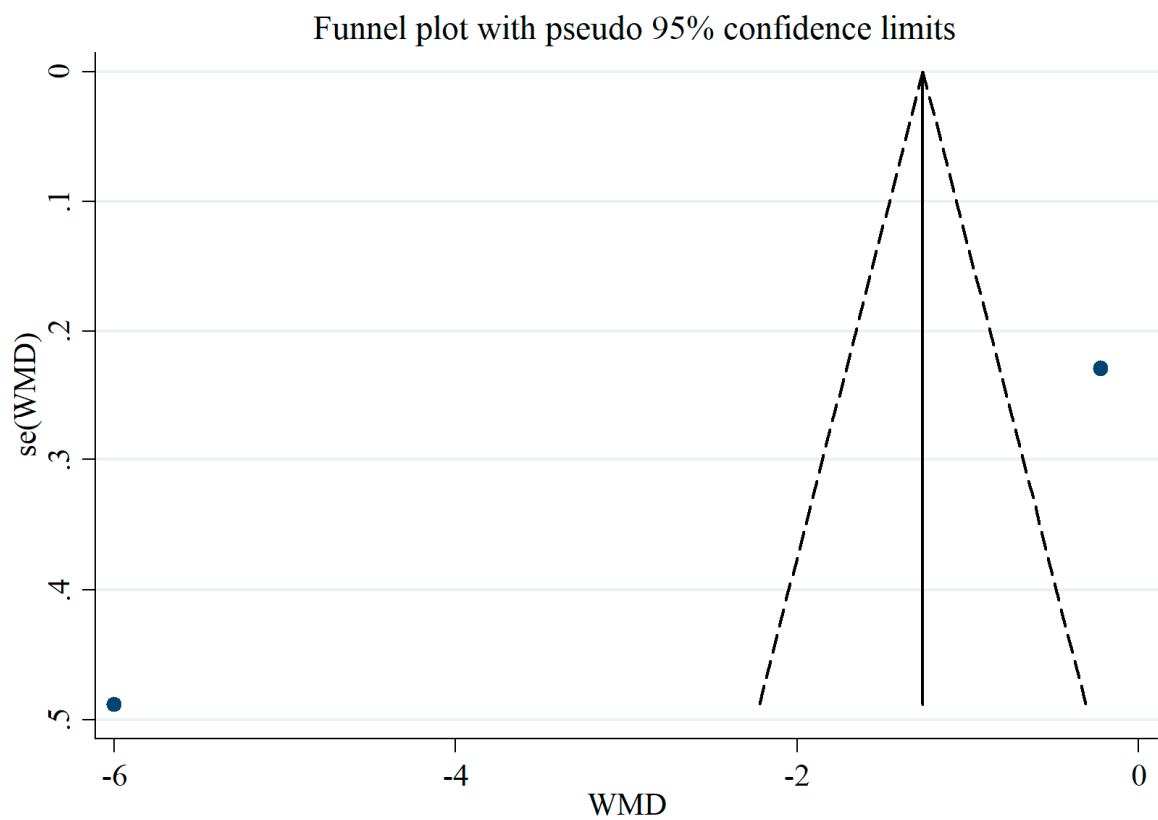

**Supplementary Figure S18.** Funnel plot representing publication bias in the studies reporting the effect of nano-curcumin on TNF- $\alpha$ .

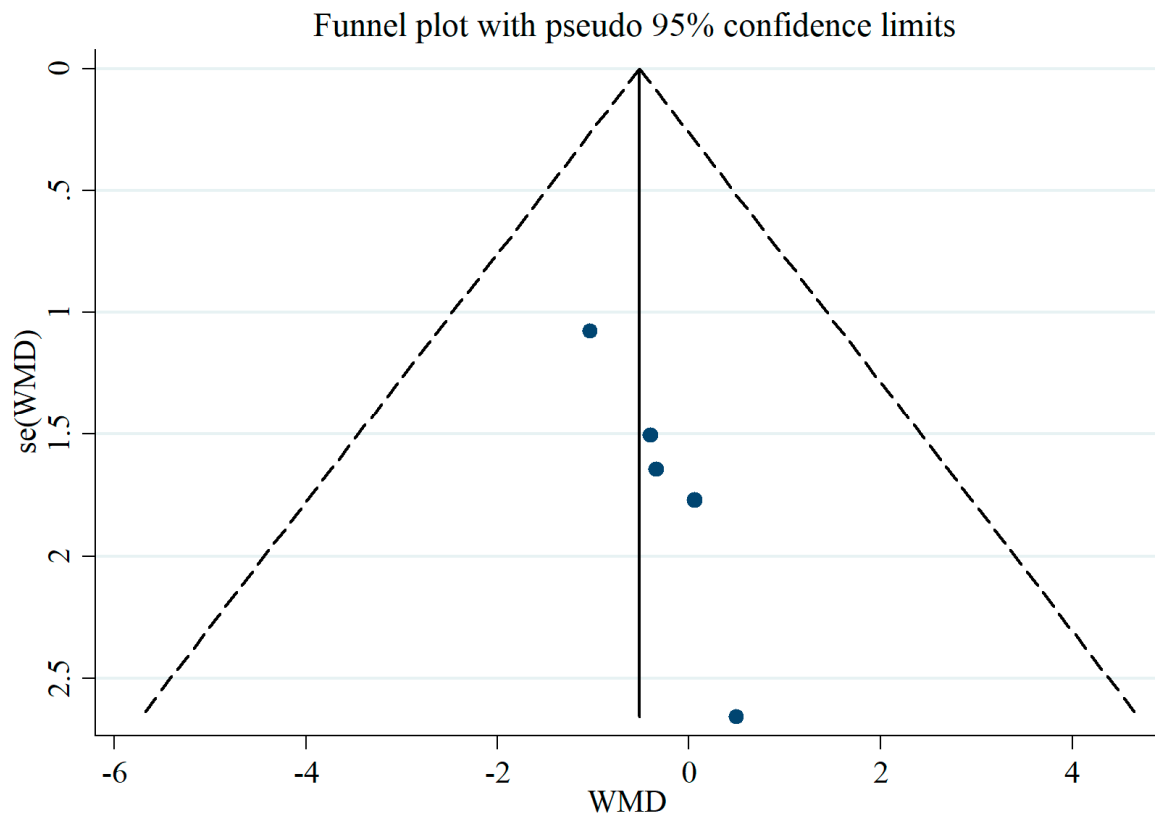

**Supplementary Figure S19.** Funnel plot representing publication bias in the studies reporting the effect of nano-curcumin on body weight.

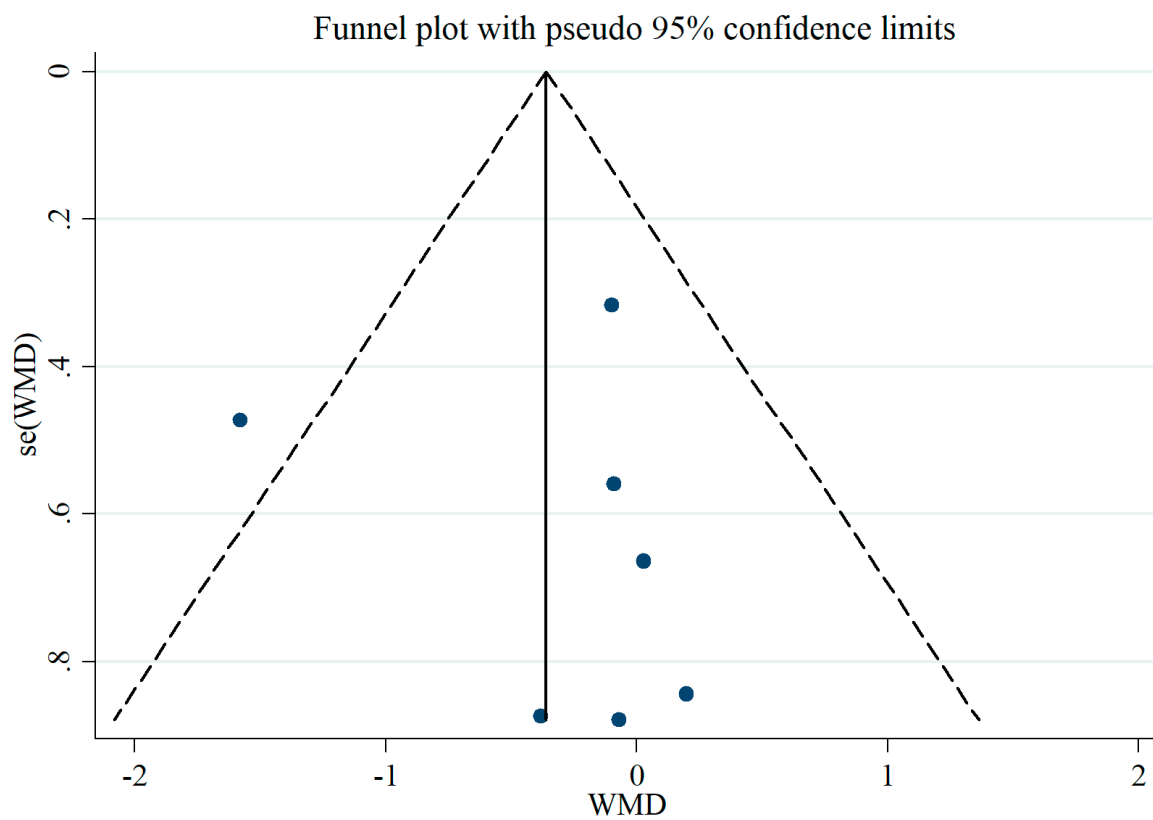

**Supplementary Figure S20.** Funnel plot representing publication bias in the studies reporting the effect of nano-curcumin on BMI.

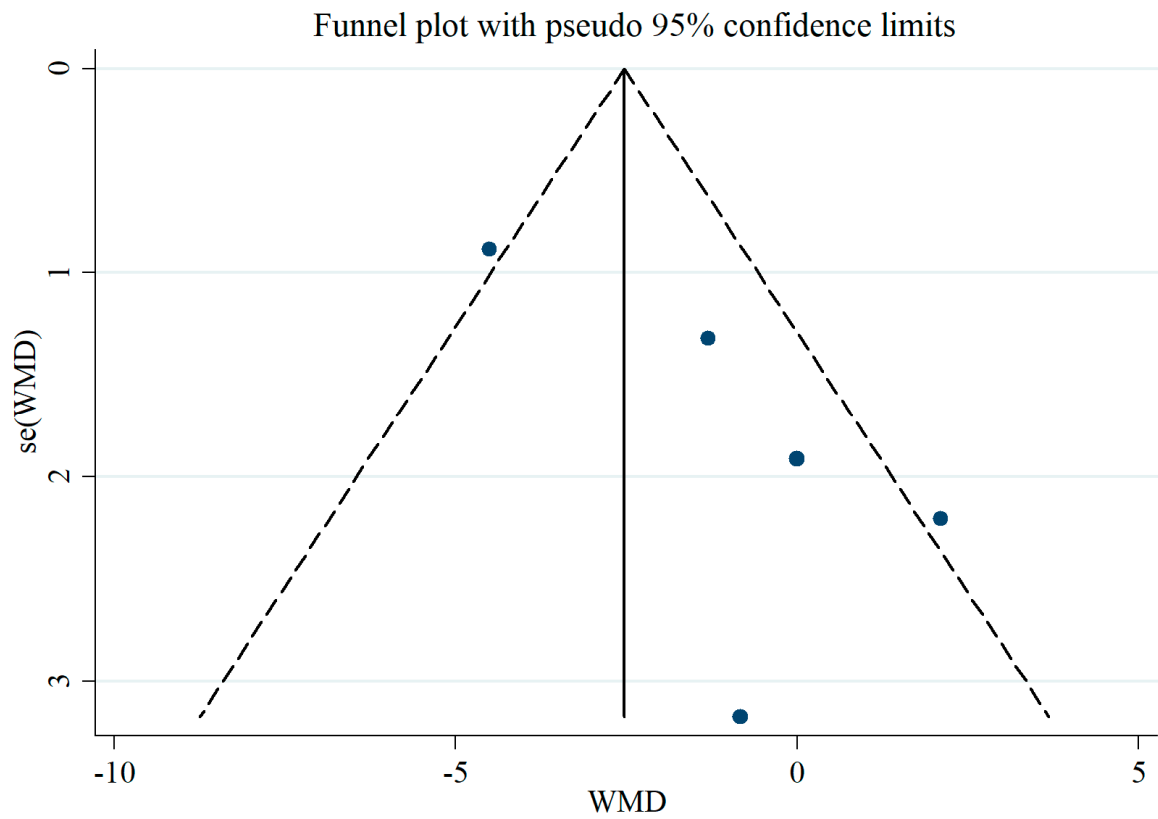

**Supplementary Figure S21.** Funnel plot representing publication bias in the studies reporting the effect of nano-curcumin on WC.

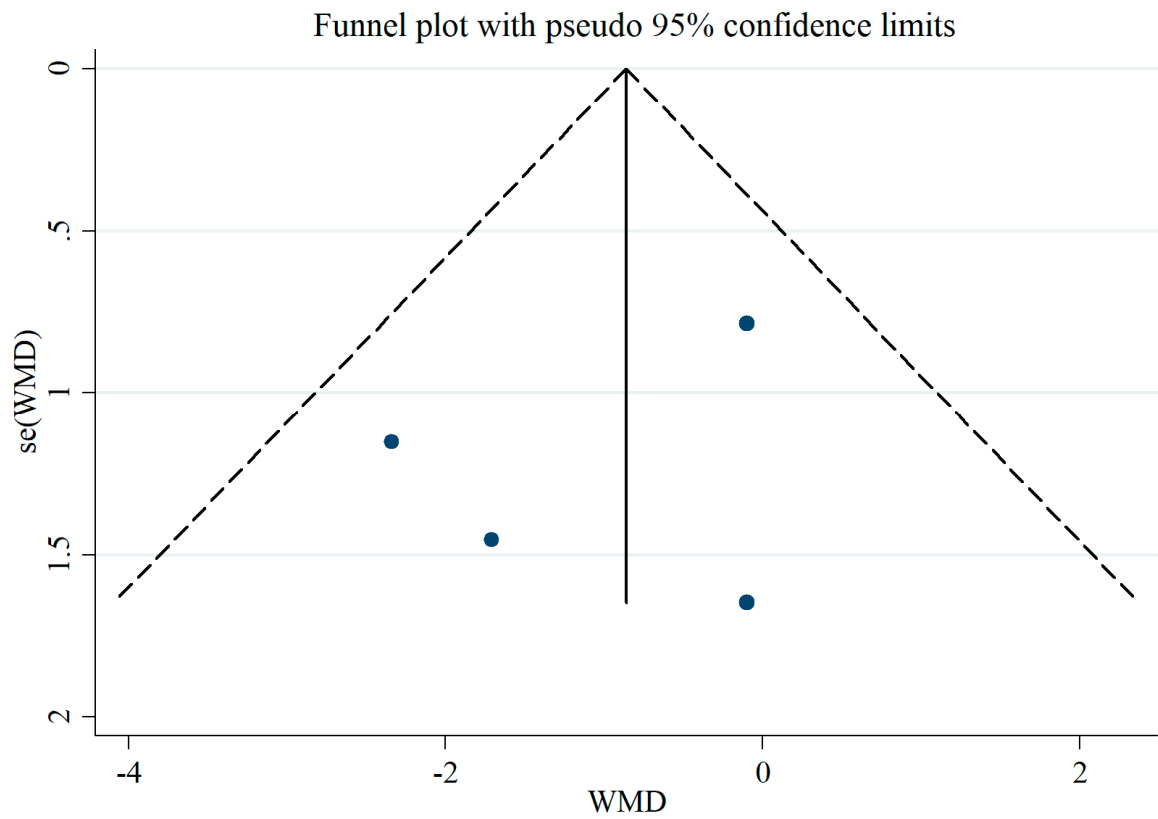

**Supplementary Figure S22.** Funnel plot representing publication bias in the studies reporting the effect of nano-curcumin on FM.

**Supplementary Table S1.** Quality assessment of included studies.

| studies                         | Random<br>sequence<br>generation | Allocation<br>concealment | Selective<br>reporting | Other<br>sources of<br>bias | Blinding<br>(participants and<br>personnel) | Blinding<br>(outcome<br>assessment) | Incomplete<br>outcome<br>data |
|---------------------------------|----------------------------------|---------------------------|------------------------|-----------------------------|---------------------------------------------|-------------------------------------|-------------------------------|
| Vafadar afshar et al.<br>2020   | L                                | U                         | H                      | U                           | L                                           | U                                   | L                             |
| Jazayeri-Tehrani et al.<br>2019 | L                                | U                         | H                      | U                           | L                                           | L                                   | L                             |
| Abdolahi et al. 2017            | L                                | L                         | H                      | U                           | L                                           | U                                   | L                             |
| Rahimi et al. 2016              | L                                | U                         | H                      | U                           | L                                           | L                                   | L                             |
| Osali. 2020                     | L                                | L                         | H                      | U                           | L                                           | L                                   | L                             |
| Asadi et al. 2019               | L                                | U                         | H                      | U                           | L                                           | U                                   | L                             |
| Bateni et al. 2021              | L                                | U                         | H                      | U                           | L                                           | U                                   | L                             |
| Abdolahi et al. 2018            | L                                | L                         | H                      | U                           | L                                           | U                                   | L                             |
| Shafabakhsh et al.<br>2020      | L                                | L                         | H                      | U                           | L                                           | L                                   | L                             |

Abbreviations: L, low risk of bias; H, high risk of bias; U, unclear risk of bias.
